# Supplementary material for: Initial Findings from a Novel School-Based Program, EMPATHY, Which May Help Reduce Depression and Suicidality in Youth
Source: PubMed Central journal article supplement (PMC4431804; doi:10.1371/journal.pone.0125527), 2015-05-14
Supplement: pone.0125527.s001.pdf [file pone.0125527.s001.pdf]

TREND Statement Checklist

| Paper Section/<br>Topic   | Item No | Descriptor                                                                                                                        | Reported? |        |
|---------------------------|---------|-----------------------------------------------------------------------------------------------------------------------------------|-----------|--------|
|                           |         |                                                                                                                                   | ✓         | Page # |
| <b>Title and Abstract</b> |         |                                                                                                                                   |           |        |
| Title and Abstract        | 1       | Information on how students allocated                                                                                             | ✓         | 2      |
|                           |         | Structured abstract                                                                                                               | ✓         | 2      |
|                           |         | Information on target population                                                                                                  | ✓         | 2      |
| <b>Introduction</b>       |         |                                                                                                                                   |           |        |
| Background                | 2       | Scientific background and explanation of rationale                                                                                | ✓         | 3      |
|                           |         | Theories used in designing behavioural interventions                                                                              | ✓         | 3      |
| <b>Methods</b>            |         |                                                                                                                                   |           |        |
| Participants              | 3       | Eligibility criteria for participants                                                                                             | ✓         | 10     |
|                           |         | Methods of recruitment                                                                                                            | ✓         | 7      |
|                           |         | Recruitment setting                                                                                                               | ✓         | 8      |
|                           |         | Setting and locations where data collected                                                                                        | ✓         | 8      |
| Interventions             | 4       | Details of interventions intended for each study condition and how and when they were actually administered, including            | ✓         | 12     |
|                           |         | Content: what was given                                                                                                           | ✓         | 10     |
|                           |         | Delivery method: how was content given?                                                                                           |           | 10     |
|                           |         | Unit of delivery: how were the subjects grouped during delivery?                                                                  | ✓         | 10     |
|                           |         | Deliverer: who delivered the intervention?                                                                                        | ✓         | 10     |
|                           |         | Setting: where was the intervention delivered?                                                                                    | ✓         | 8      |
|                           |         | Exposure quantity and duration: how many sessions or episodes were intended to be delivered? How long were they intended to last? | ✓         | 10     |
|                           |         | Time span: how long was it intended to take to deliver the intervention to each unit?                                             | ✓         | 13     |
|                           |         | Activities to increase compliance or adherence (e.g. incentives)                                                                  | N/A       |        |
| Objectives                | 5       | Specific objectives and hypotheses                                                                                                | ✓         | 6      |
| Objectives                | 6       | Clearly defined primary and secondary outcome measures                                                                            | ✓         | 6      |

|                     |    |                                                                                                                                                     |     |    |
|---------------------|----|-----------------------------------------------------------------------------------------------------------------------------------------------------|-----|----|
|                     |    | Methods used to collect data and any methods used to enhance the quality of measurements                                                            | ✓   | 7  |
|                     |    | Information on validated instruments such as psychometric and biometric properties                                                                  | ✓   | 10 |
| Sample Size         | 7  | How sample size was determined                                                                                                                      | ✓   | 16 |
| Assignment Method   | 8  | Unit of assignment                                                                                                                                  | ✓   | 16 |
|                     |    | Methods used to assign units to study conditions, including details of any restriction                                                              | ✓   | 16 |
|                     |    | Inclusion of aspects employed to minimize potential bias induced by non-randomization (e.g., matching)                                              | N/A |    |
| Blinding (masking)  | 9  | Whether or not participants, those administering the interventions, and those assessing the outcomes were blinded to the study condition assignment | N/A |    |
| Unit of Analysis    | 10 | Description of the smallest unit that is analyzed to assess intervention effects (e.g., individual, group, or community)                            | ✓   | 16 |
|                     |    | If the unit of analysis differs from the unit of assignment, the analytical method used to account for this                                         | N/A |    |
| Statistical Methods | 11 | Statistical methods used to compare study groups for primary methods outcome(s)                                                                     | ✓   | 16 |
|                     |    | Statistical methods used for additional analyses, such as subgroup analyses and adjusted analysis                                                   | ✓   | 16 |
|                     |    | Methods for imputing missing data, if used                                                                                                          | N/A |    |
|                     |    | Statistical software or programs used                                                                                                               | ✓   | 16 |
| <b>Results</b>      |    |                                                                                                                                                     |     |    |
| Participant flow    | 12 | Flow of participants through each stage of the study: enrollment, assignment, allocation, and intervention exposure, follow-up, analysis            | ✓   | 17 |
|                     |    | Enrollment: the number screened for eligibility                                                                                                     | ✓   | 17 |
|                     |    | Assignment: the number assigned to a study condition                                                                                                | ✓   | 17 |
|                     |    | Allocation and intervention exposure: the number of participants                                                                                    | ✓   | 17 |

|                         |    |                                                                                                                                                           |     |    |
|-------------------------|----|-----------------------------------------------------------------------------------------------------------------------------------------------------------|-----|----|
|                         |    | assigned to each study condition and the number who received each intervention                                                                            |     |    |
|                         |    | Follow-up: the number of participants included in or excluded from the main analysis, by study condition                                                  | ✓   | 17 |
|                         |    | Description of protocol deviations from study as planned, along with reasons                                                                              | N/A |    |
| Recruitment             | 13 | Dates defining the periods of recruitment and follow-up                                                                                                   | ✓   | 7  |
| Baseline Data           | 14 | Baseline demographic and clinical characteristics of participants in each study condition                                                                 | ✓   | 17 |
|                         |    | Baseline characteristics for each study condition relevant to specific disease prevention research                                                        | ✓   | 17 |
|                         |    | Baseline comparisons of those lost to follow-up and those retained, overall and by study condition                                                        | ✓   | 17 |
|                         |    | Comparison between study population at baseline and target population of interest                                                                         | N/A |    |
| Baseline equivalence    | 15 | Data on study group equivalence at baseline and statistical methods used to control for baseline differences                                              | N/A |    |
| Numbers analyzed        | 16 | Number of participants (denominator) included in each analysis for each study condition, particularly when the denominators change for different outcomes | ✓   | 17 |
|                         |    | Indication of whether the analysis strategy was “intention to treat” or, if not, description of how non-compliers were treated in the analysis            | ✓   | 16 |
| Outcomes and estimation | 17 | For each primary and secondary outcome, a summary of results for each estimation study condition                                                          | ✓   | 17 |
|                         |    | Inclusion of null and negative findings                                                                                                                   | ✓   | 17 |
|                         |    | Inclusion of results from testing pre-specified causal pathways through which the intervention was intended to operate, if any                            | N/A |    |
| Ancillary Analyses      | 18 | Summary of other analyses performed, including sub-group or restricted                                                                                    | ✓   | 17 |

|                   |    |                                                                                                                                                                                                                                                                         |     |    |
|-------------------|----|-------------------------------------------------------------------------------------------------------------------------------------------------------------------------------------------------------------------------------------------------------------------------|-----|----|
|                   |    | analyses, indicating which are pre-specified or exploratory                                                                                                                                                                                                             |     |    |
| Adverse events    | 19 | Summary of all important adverse events or unintended effects in each study condition                                                                                                                                                                                   | N/A |    |
| <b>Discussion</b> |    |                                                                                                                                                                                                                                                                         |     |    |
| Interpretation    | 20 | Interpretation of the results, taking into account study hypotheses, sources of potential bias, imprecision of measures, multiplicative analyses, and other limitations or weaknesses of the study                                                                      | ✓   | 22 |
|                   |    | Discussion of results taking into account the mechanism by which the intervention was intended to work                                                                                                                                                                  | N/A |    |
|                   |    | Discussion of the success of and barriers to implementation of this intervention, fidelity of implementation                                                                                                                                                            | ✓   | 27 |
|                   |    | Discussion of research, programmatic, or policy implications                                                                                                                                                                                                            | ✓   | 22 |
| Generalizability  | 21 | Generalizability (external validity) of trial findings, taking into account the study population, the characteristics of the intervention, length of follow-up, incentives, compliance rates, specific sites/settings involved in the study and other contextual issues | ✓   | 22 |
| Overall Evidence  | 22 | General interpretation of results in the context of current evidence and current theory                                                                                                                                                                                 | ✓   | 29 |
